# Supplementary material for: Pretreatment Proteinuria Predicts the Prognosis of Patients Receiving Systemic Therapy for Unresectable Hepatocellular Carcinoma
Source: MDPI journal article supplement (doi:10.3390/cancers15102853), 2023-05-21
Supplement: s1 [file s1]

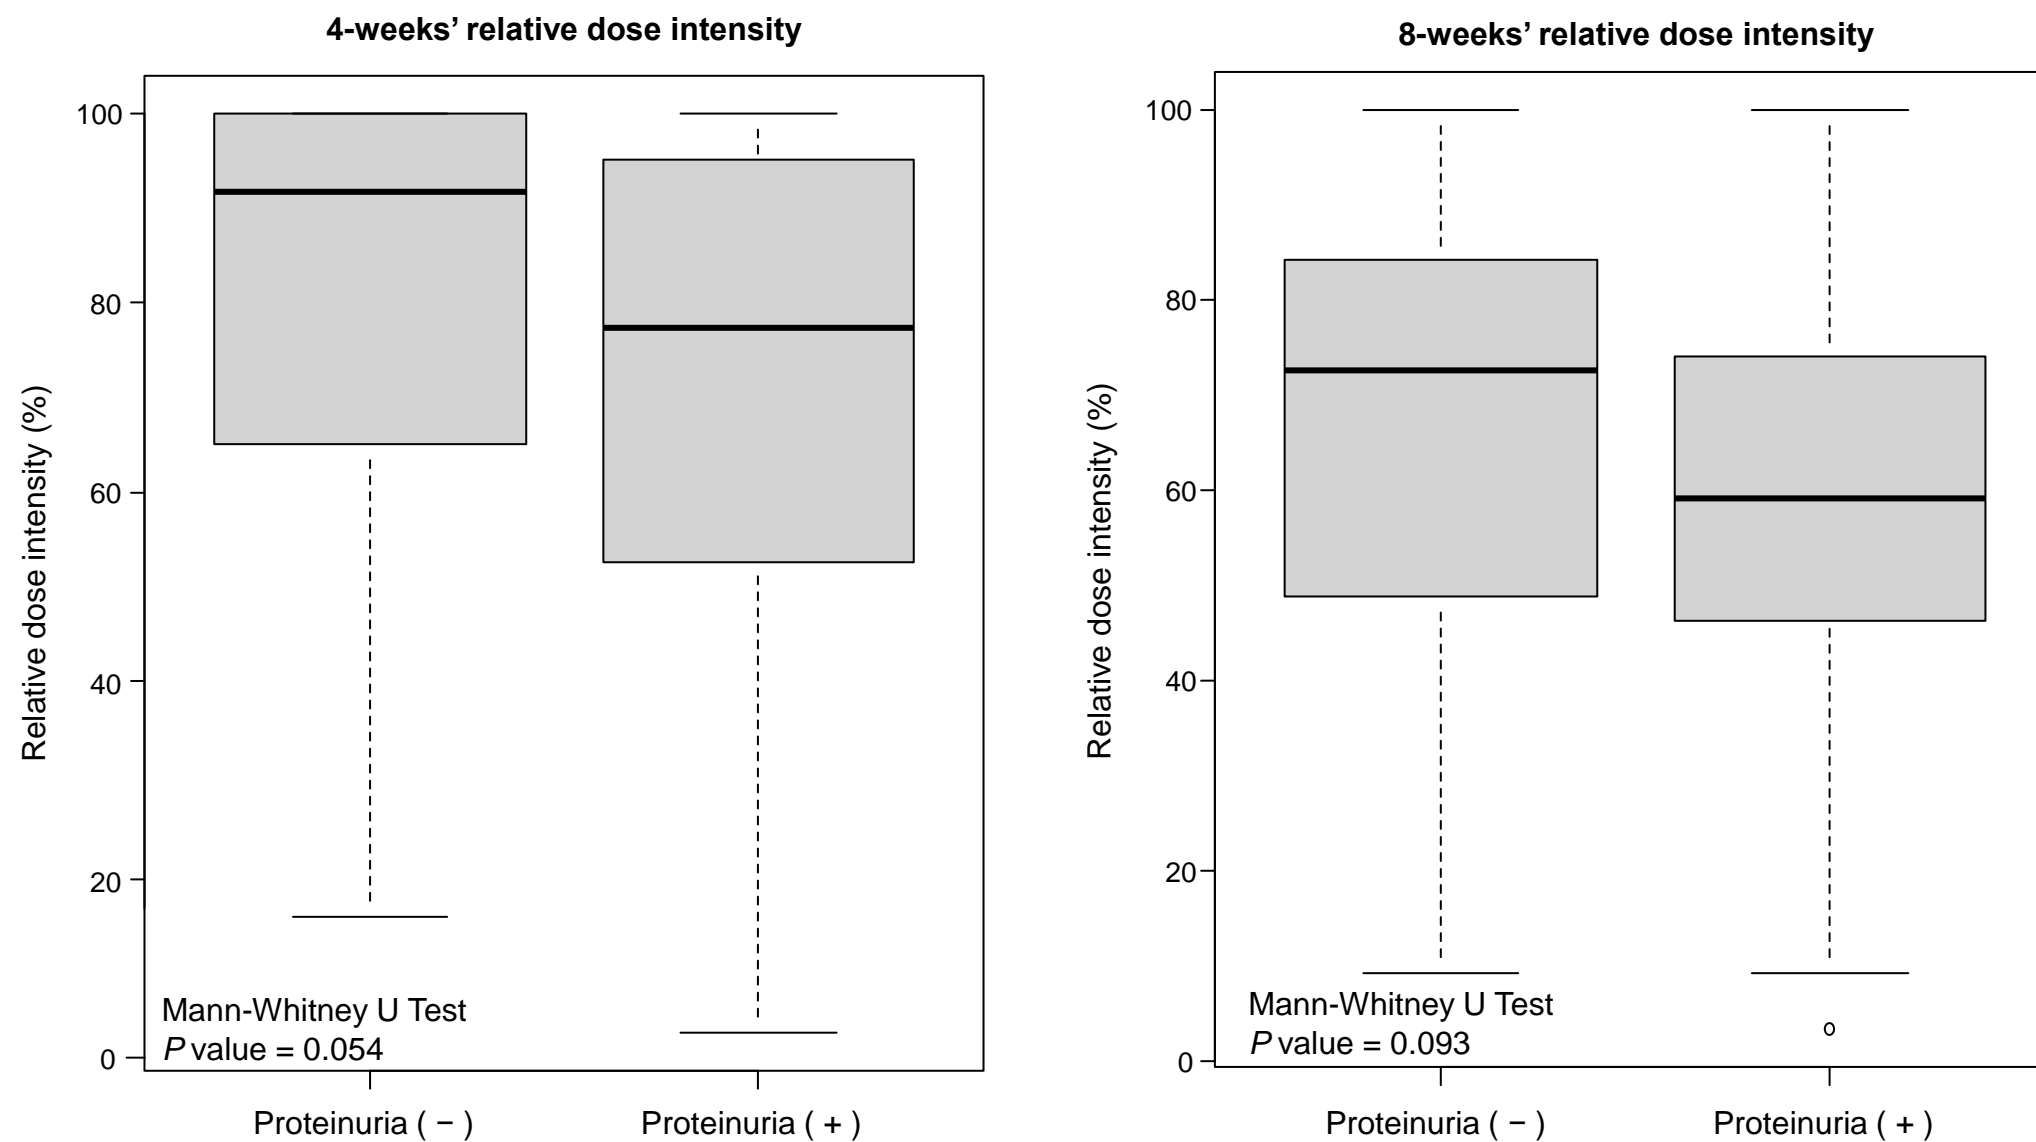

**Supplemental Figure S1.** Relative dose intensity of lenvatinib based on pretreatment proteinuria. Positive pretreatment proteinuria was defined as a ratio of urinary protein to creatinine of  $\geq 0.15$  g/g creatinine. Within each box, horizontal black lines denote median values; boxes extend from the 25<sup>th</sup> to the 75<sup>th</sup> percentile of each group's distribution of values; vertical extending lines denote adjacent values (i.e., the most extreme values within 1.5 interquartile range of the 25<sup>th</sup> and 75<sup>th</sup> percentile of each group); dots denote observations outside the range of adjacent values.

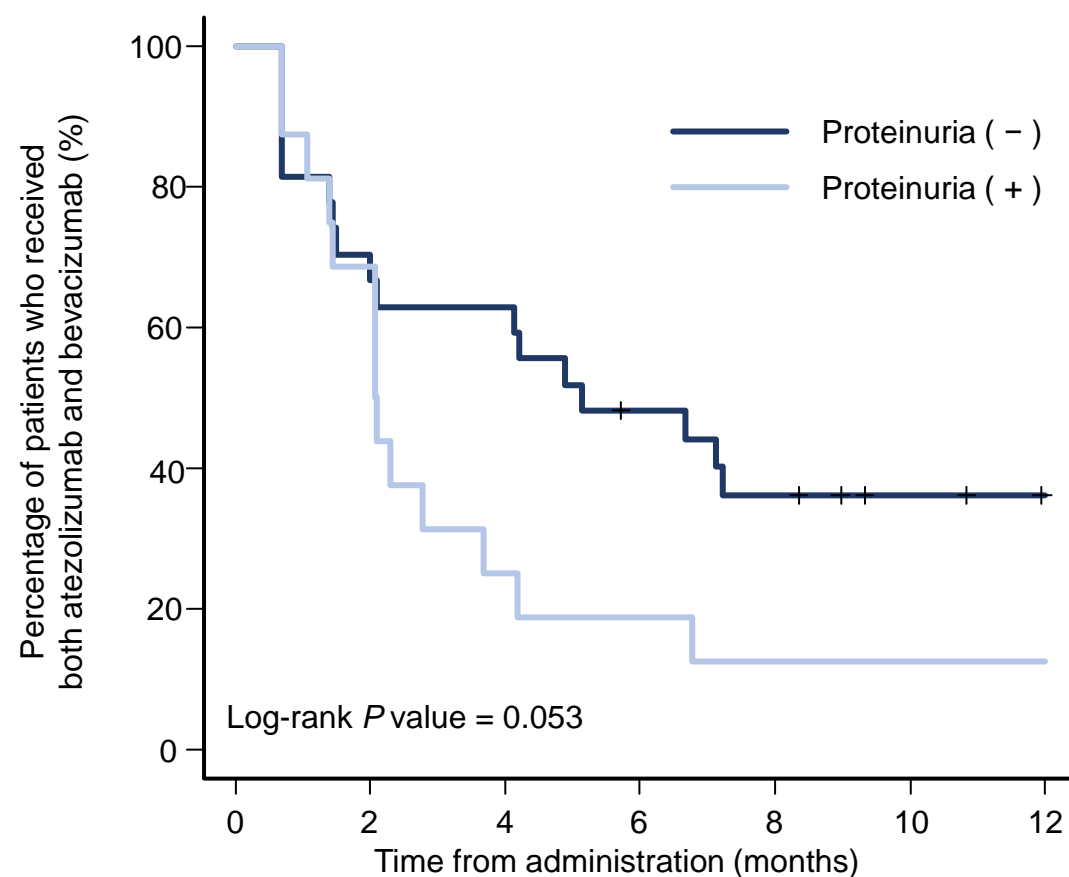

| Number at risk    |    |    |    |    |   |   |   |
|-------------------|----|----|----|----|---|---|---|
| Proteinuria ( - ) | 27 | 19 | 17 | 12 | 9 | 6 | 4 |
| Proteinuria ( + ) | 16 | 11 | 4  | 3  | 2 | 2 | 2 |

**Supplemental Figure S2.** Kaplan-Meier analysis of treatment duration with atezolizumab and bevacizumab without discontinuation of bevacizumab due to adverse events. Kaplan-Meier estimates were calculated for patients who received atezolizumab and bevacizumab without skipping bevacizumab doses due to adverse events. Positive pretreatment proteinuria was defined as a ratio of urinary protein to creatinine of  $\geq 0.15$  g/g creatinine.
